# Supplementary material for: Network Evolution of Body Plans
Source: PLOS journal article supplement (doi:10.1371/journal.pone.0002772), 2008-07-22

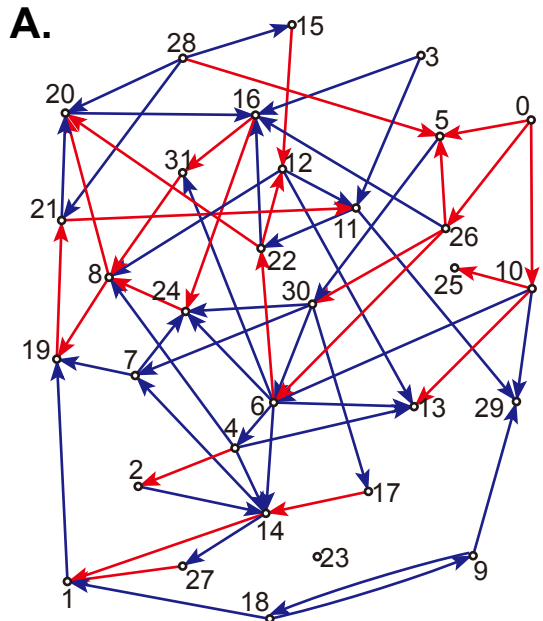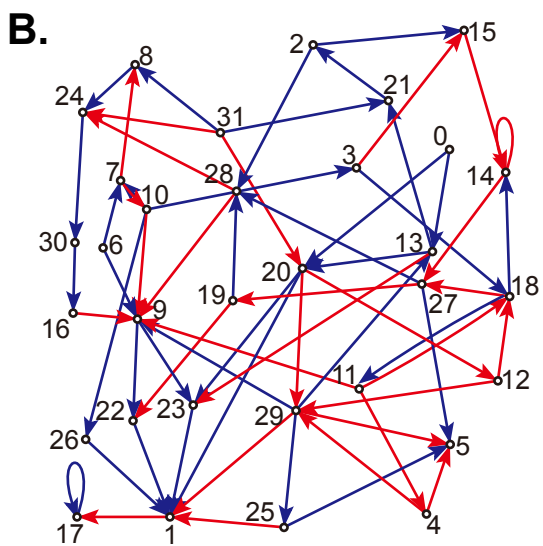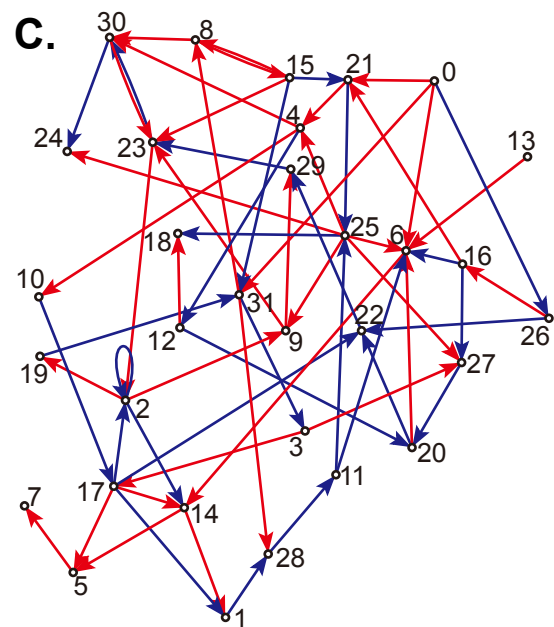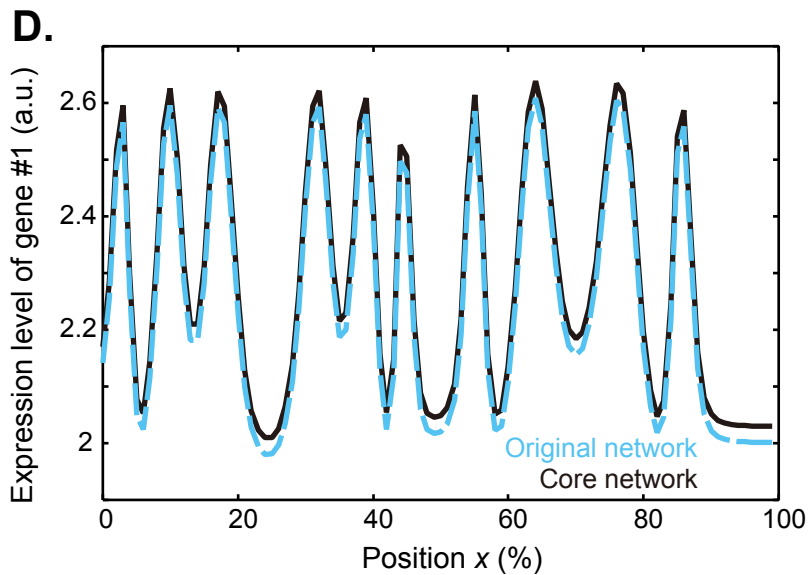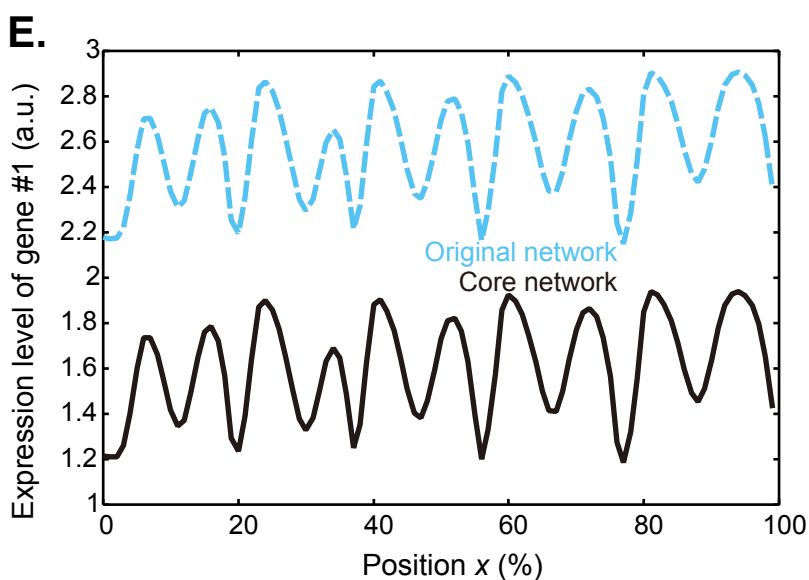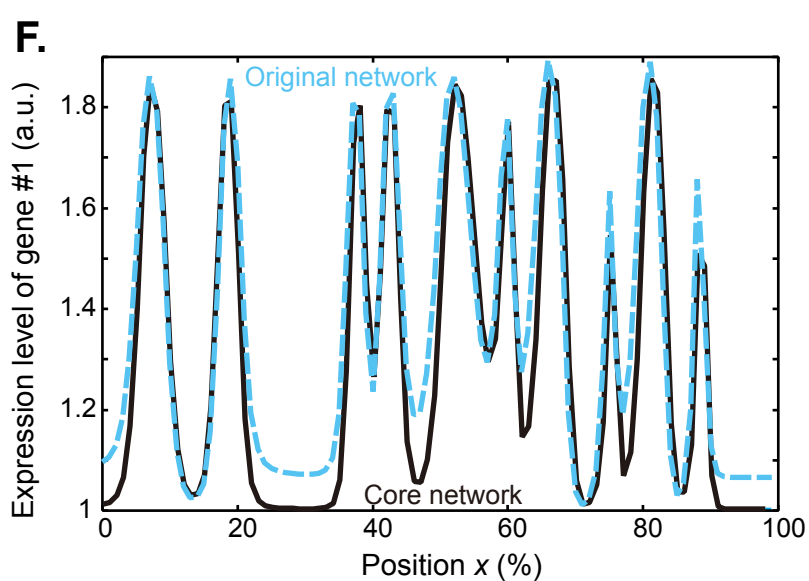

Supplement: S6 (10.1371/journal.pone.0002772.s006) [file journal.pone.0002772.s006]
